# Supplementary material
Source: PubMed Central journal article supplement (PMC8370231)
Supplement: aac.00729-21-s0001.pdf [file aac.00729-21-s0001.pdf]

**Table S1.** Complete predicted protein of AreR resulting from gene sequencing analysis of each isolate and the corresponding MIC of erythromycin ( $\mu\text{g/ml}$ ), for 16 erythromycin resistant *Aliarcobacter butzleri* strains (MIC  $>8 \mu\text{g/ml}$ ) and 56 susceptible strains.

| Strain         | MIC of erythromycin ( $\mu\text{g/ml}$ ) | AreR protein sequence                                                                                                                                                                             | Truncated protein |
|----------------|------------------------------------------|---------------------------------------------------------------------------------------------------------------------------------------------------------------------------------------------------|-------------------|
| A11-2          | 32                                       | LSTKNKIDKNYLNIIIEILLNDGISGLSIIKVATKANISIGG<br>VQYIFGNKEGMIKAVFRKK*                                                                                                                                | Yes               |
| AB 11/11       | 32                                       | LSTKNKIDKNYLNIIIEILLNDGISGLSIRKVAYFNRWCSI<br>YLWK*                                                                                                                                                | Yes               |
| AB 12/11       | 32                                       | LSTKNKIDKNYLNIIIEILLNDGISGLSIRKVAYFNRWCSI<br>YLWK*                                                                                                                                                | Yes               |
| AB 21/11       | 16                                       | LSTKNKIDKNYLNIIIEILLNDGISGLSIRKVATKANISIGG<br>VQYIFGNKEGMIKAVLEKNEEDYNRQIKILLKDDNSKYS<br>QLKAHIEYISKHNDNEEFDKISKIITILLQEKVFEGLDQW<br>YSASLNSIDTNTDEGKKLRLAFLFSEAMFTLMTLKYINIS<br>PKEQKEIFEDLKTFL* | No                |
| AB 26/11       | 16                                       | LSTKNKIDKNYLNIIIEILLNDGISGLSIRKVATKANISIGG<br>VQYIFGNKEGMIKAVLEKNEEDYNRQIKILLKDDNSKYS<br>QLKAHIEYISKHNDNEEFDKISKIITILLQEKVFEGLDQW<br>YSASLNSIDTNTDEGKKLRLAFLFSEAMFTLMTLKYINIS<br>PKEQKEIFEDLKTFL* | No                |
| <b>AB_2811</b> | 32                                       | LSTKNKIDKNYLNIIIEILLNDGISGLSIRKVATKANISIGG<br>VQYIFGNKEGMIKAVLEKNEEDYNRQIKILLKDDNSKYS<br>QLKAHIEYISKHNDNEEFDKISKIITILLQEKVFEGLDQW<br>YSAS*                                                        | Yes               |
| AB 33/11       | 32                                       | LSTKNKIDKNYLNIIIEILLNDGISGLSIRKVATKANISIGG<br>VQYIFGNKEGMIKAVLEKNEEDYNRQIKILLKDDNSKYS<br>QLKAHIEYISKHNDNEEFDKISKIITILLQEKVFEGLQRL<br>VEHIFKFY*                                                    | Yes               |
| AB 46/11       | 32                                       | LSTKNKILNFR*                                                                                                                                                                                      | Yes               |
| AB 52/11       | 16                                       | LSTKNKIDKNYLNIIIEILLNDGISGLSIRKVATKANISIGG<br>VQYIFGNKEGMIKAVLEKNEEDYNRQIKILLKDDNSKYS<br>QLKAHIEYISKHNDNEEFDKISKIITILLQEKVFEGLDQW<br>YSASLNSIDTNTDEGKKLRLAFLFSEAMFTLMTLKYINIS<br>PKEQKEIFEDLKTFL* | No                |
| CR22-1A        | 16                                       | LSTKNKIDKNYLNIIIEILLRRMHLATQMHKHLAS*                                                                                                                                                              | Yes               |
| <b>CR424</b>   | 32                                       | LSTKNKIDKNYLNIIIEILLNDGISGLSIRKVATKANISIGG<br>VQYIFGNKEGMIKAVLEKNEEDYNRQIKILLKDDNSKYS<br>QLKAHIEYISKHNDNEEFDKISKIITILLQEKVFVDTGTQRI<br>WPPRAFTLGQLTHNDLAS*                                        | Yes               |
| <b>CR502</b>   | 32                                       | LSTKNKIDKNYLNIIIEILLNDGISGLSIRKVATKANISIGG<br>VQYIFGNKEGMIKAVLEKNEEDYNRQIKILLKDDNSKYS<br>QLKAHIEYISKHNDNEEFDKISKIITILLQEHLV*                                                                      | Yes               |
| <b>CR641</b>   | 32                                       | LSTKNKIDKNYLNIIIEILLNDGISGLSIRKVATKANISIGG<br>VQYIFGNKEGMIKAVLEKNEEDYNRQIKILLKDDNSKYS<br>QLKAHIEYISKHNDNEEFDKISKIITILLQEKVFEGLDQW<br>YSASLNSIDTNTDEGKN*                                           | Yes               |
| CR88-1         | 16                                       | LSTKNKIDKNYLNIIIEILLNDGISGLSIRKVATKANISIGG<br>VQYIFGNKEGMIKAVLEKNEEDYNRQIKILLKDDNSKYS<br>QLKAHIEYISKHNDNEEFDKISKIITILLQEKVFEGLDQW<br>YSASLNSIDTNTDEGKN*                                           | Yes               |
| CR107-3        | 32                                       | LSTKNKIDKNYLNIIIEILLNDGISGLSIRKVATKANISIGG<br>VQYIFGNKEGMIKAVLEKNEEDYNRQIKILLKDDNSKYS                                                                                                             | Yes               |

|               |    |                                                                                                                                                                                                                                                                                               |     |
|---------------|----|-----------------------------------------------------------------------------------------------------------------------------------------------------------------------------------------------------------------------------------------------------------------------------------------------|-----|
| INSA2808      | 32 | QLKAHIEYISKHNDNEEFDKISKIITILLQEKVFVEGLQDW<br>YSTSLNSIDTNTDEGKKLRLFFIFRSNVHINDFKIYKHIS*<br>LSTKNKIDKNYLINIIEEILLNDGISGLSIRKVATKANISIGG<br>VQYIFGNKEGMIKAVLEKMKRIIVK*<br>LSTKNKIDKNYLINIIEEILLNDGISGLSIRKVATKANISIGG<br>VQYIFGNKEGMIKAVLEKNEEDYNRQIKILLKDDNSKYS                                 | Yes |
| DQ1dM1        | 2  | QLKAHIEYISKHNDNEEFDKISKIITILLQEKVFVEGLQDW<br>YSASLNSIDTNTDEGKKLRLAFLFSEAMFTLMTLKYINIS<br>PKEQKEIFEDLKTFL*<br>LSTKNKIDKNYLINIIEEILLNDGISGLSIRKVATKANISIGG<br>VQYIFGNKEGMIKAVLEKNEEDYNRQIKILLKDDNSKYS                                                                                           | No  |
| DQ13A1        | 4  | ---                                                                                                                                                                                                                                                                                           | --- |
| DQ15A1        | 2  | LSTKNKIDKNYLINIIEEILLNDGISGLSIRKVATKANISIGG<br>VQYIFGNKEGMIKAVLEKNEEDYNRQIKILLKDDNSKYS<br>QLKAHIEYISKHNDNEEFDKISKIITILLQEKVFVEGLQDW<br>YSASLNSIDTNTDEGKKLRLAFLFSEAMFTLMTLKYINIS<br>PKEQKEIFEDLKTFL*<br>LSTKNKIDKNYLINIIEEILLNDGISGLSIRKVATKANISIGG<br>VQYIFGNKEGMIKAVLEKNEEDYNRQIKILLKDDNSKYS | No  |
| DQ19M1        | 2  | QLKAHIEYISKHNDNEEFDKISKIITILLQEKVFVEGLQDW<br>YSASLNSIDTNTDEGKKLRLAFLFSEAMFTLMTLKYINIS<br>PKEQKEIFEDLKTFL*<br>MSTKNKIDKNYLINIIEEILLNDGISGLSIRKVATKANISIG<br>GVQYIFGNKEGMIKAVLEKNEEDYNRQIKILLKDDNSKY                                                                                            | No  |
| <b>DQ40A1</b> | 2  | SQLKAHIEYISKHNDNEEFDKISKIITILLQEKVFVEGLQD<br>WYSTSLNSIDTNTDEGKKLRLAFLFSEAMFTLMTLKYINI<br>SPKEQKEIFEDLKTFL*<br>LSTKNKIDKNYLINIIEEILLNDGISGLSIRKVATKANISIGG<br>VQYIFGNKEGMIKAVLEKNEEDYNRQIKILLKDDNSKYS                                                                                          | No  |
| DQ44M1        | 4  | QLKAHIEYISKHNDNEEFDKISKIITILLQEKVFVEGLQDW<br>YSTSLNSIDTNTDEGKKLRLAFLFSEAMFTLMTLKYINISP<br>KEQKEIFEDLKTFL*<br>LSTKNKIDKNYLINIIEEILLNDGISGLSIRKVATKANISIGG<br>VQYIFGNKEGMIKAVLEKNEEDYNRQIKILLKDDNSKYS                                                                                           | No  |
| <b>DQ64A1</b> | 1  | ---                                                                                                                                                                                                                                                                                           | --- |
| DQ46A2        | 2  | LSTKNKIDKNYLINIIEEILLNDGISGLSIRKVATKANISIGG<br>VQYIFGNKEGMIKAVLEKNEEDYNRQIKILLKDDNSKYS<br>QLKAHIEYISKHNDNEEFDKISKIITILLQEKVFVEGLQDW<br>YSASLNSIDTNTDEGKKLRLAFLFSEAMFTLMTLKYINIS<br>PKEQKEIFEDLKTFL*<br>LSTKNKIDKNYLINIIEEILLNDGISGLSIRKVATKANISIGG<br>VQYIFGNKEGMIKAVLEKNEEDYNRQIKILLKDDNSKYS | No  |
| DQ65A3        | 2  | QLKAHIEYISKHNDNEEFDKISKIITILLQEKVFVEGLQDW<br>YSTSLNSIDTNTDEGKKLRLAFLFSEAMFTLMTLKYINISP<br>KEQKEIFEDLKTFL*<br>LSTKNKIDKNYLINIIEEILLNDGISGLSIRKVATKANISIGG<br>VQYIFGNKEGMIKAVLEKNEEDYNRQIKILLKDDNSKYS                                                                                           | No  |
| DQ68M4        | 2  | ---                                                                                                                                                                                                                                                                                           | --- |
| DQ72A1        | 2  | LSTKNKIDKNYLINIIEEILLNDGISGLSIRKVATKANISIGG<br>VQYIFGNKEGMIKAVLEKNEEDYNRQIKILLKDDNSKYS<br>QLKAHIEYISKHNDNEEFDKISKIITILLQEKVFVEGLQDW<br>YSASLNSIDTNTDEGKKLRLAFLFSEAMFTLMTLKYINIS<br>PKEQKEIFEDLKTFL*<br>LSTKNKIDKNYLINIIEEILLNDGISGLSIRRVATKANISIGG<br>VQYIFGNKKGMIKAVLEKNEEDYNRQIKILLKDDNSKYS | No  |
| A6-1          | 4  | ---                                                                                                                                                                                                                                                                                           | --- |
| A8-1          | 2  | LSTKNKIDKNYLINIIEEILLNDGISGLSIRRVATKANISIGG<br>VQYIFGNKKGMIKAVLEKNEEDYNRQIKILLKDDNSKYS<br>QLKAHIEYISKHNDNEEFDKISKIITILLQEKVFVEGLQDW<br>YSTSLNSIDTNTDEGKKLRLAFLFSEAMFTLMTLKYINISP<br>KEQKEIFEDLKTFL*<br>LSTKNKIDKNYLINIIEEILLNDGISGLSIRRVATKANISIGG<br>VQYIFGNKKGMIKAVLEKNEEDYNRQIKILLKDDNSKYS | No  |
| A9-4          | 2  | QLKAHIEYISKHNDNEEFDKISKIITILLQEKVFVEGLQDW<br>YSASLNSIDTNTDEGKKLRLAFLFSEAMFTLMTLKYINIS<br>PKEQKEIFEDLKTFL*<br>LSTKNKIDKSYLINIIEEILLNDGISGLSIRKVATKANISIGG<br>VQYIFGNKEGMIKAVLEKNEEDYNRQIKILLKDDNSKYS                                                                                           | No  |
| A12-1         | 2  | LSTKNKIDKSYLINIIEEILLNDGISGLSIRKVATKANISIGG<br>VQYIFGNKEGMIKAVLEKNEEDYNRQIKILLKDDNSKYS                                                                                                                                                                                                        | No  |

|                |   |                                                                                                                                                                                                                                                                                             |     |
|----------------|---|---------------------------------------------------------------------------------------------------------------------------------------------------------------------------------------------------------------------------------------------------------------------------------------------|-----|
|                |   | QLKAHIEYISKHNDNEEFDKISKIITILLQEKVFEGQLQDW<br>YSASLNSIDTNTDEGKKLRLAFLFSEAMFTLMTLKYINIS<br>PKEQKEIFEDLKTFL*<br>LSTKNKIDKNYLINIIEILLNDGISGLSIRKVATKANISIGG<br>VQYIFGNKEGMIKAVLEKNEEDYNRQIKILLKDDNSKYS                                                                                          |     |
| AB 13/11       | 2 | QLKAHIEYISKHNDNEEFDKISKIITILLQEKVFEGQLQDW<br>YSTSLNSIDTNTDEGKKLRLAFLFSEAMFTLMTLKYINIS<br>PKEQKEIFEDLKTFL*<br>LSTKNKIDKNYLINIIEILLNDGISGLSIRRVATKANISIGG<br>VQYIFGNKKGMIKAVLEKNEEDYNRQIKILLKDDNSKYS                                                                                          | No  |
| <b>AB_2211</b> | 2 | QLKAHIEYISKHNDNEEFDKISKIITILLQEKVFLEGLQDW<br>YNASLNSIDTNTDEGKKLRLAFLFSEAMFTLMTLKYINIS<br>PKEQKEIFEDLKTFL*<br>---                                                                                                                                                                            | No  |
| AB 25/11       | 2 | ---                                                                                                                                                                                                                                                                                         | --- |
| AB 30/11       | 2 | LSTKNKIDKNYLINIIEILLNDGISGLSIRKVATKANISIGG<br>VQYIFGNKEGMIKAVLEKNEEDYNRQIKILLKDDNSKYS<br>QLKAHIEYISKHNDNEEFDKISKIITILLQEKVFEGQLQDW<br>YSASLNSIDTNTDEGKKLRLAFLFSEAMFTLMTLKYINIS<br>PKEQKEIFEDLKTFL*<br>LSTKNKIDKNYLINIIEILLNDGISGLSIRKVATKANISIGG<br>VQYIFGNKEGMIKAVLEKNEEDYNRQIKILLKDDNSKYS | No  |
| AB 31/11       | 2 | QLKAHIEYISKHNDNEEFDKISKIITILLQEKVFEGQLQDW<br>YSASLNSIDTNTDEGKKLRLAFLFSEAMFTLMTLKYINIS<br>PKEQKEIFEDLKTFL*<br>LSTKNKIDKNYLINIIEILLNDGISGLSIRKVATKANISIGG<br>VQYIFGNKEGMIKAVLEKNEEDYNRQIKILLKDDNSKYS                                                                                          | No  |
| AB 32/11       | 2 | QLKAHIEYISKHNDNEEFDKISKIITILLQEKVFEGQLQDW<br>YSASLNSIDTNTDEGKKLRLAFLFSEAMFTLMTLKYINIS<br>PKEQKEIFEDLKTFL*<br>LSTKNKIDKNYLINIIEILLNDGISGLSIRKVATKANISIGG<br>VQYIFGNKEGMIKAVLEKNEEDYNRQIKILLKDDNSKYS                                                                                          | No  |
| AB 35/11       | 2 | QLKAHIEYISKHNDNEEFDKISKIITILLQEKVFEGQLQDW<br>YSASLNSIDTNTDEGKKLRLAFLFSEAMFTLMTLKYINIS<br>PKEQKEIFEDLKTFL*<br>LSTKNKIDKNYLINIIEILLNDGISGLSIRKVATKANISIGG<br>VQYIFGNKEGMIKAVLEKNEEDYNRQIKILLKDDNSKYS                                                                                          | No  |
| AB 38/11       | 2 | QLKAHIEYISKHNDNEEFDKISKIITILLQEKVFEGQLQDW<br>YSASLNSIDTNTDEGKKLRLAFLFSEAMFTLMTLKYINIS<br>PKEQKEIFEDLKTFL*<br>LSTKNKIDKNYLINIIEILLNDGISGLSIRKVATKANISIGG<br>VQYIFGNKEGMIKAVLEKNEEDYNRQIKILLKDDNSKYS                                                                                          | No  |
| AB 42/11       | 2 | QLKAHIEYISKHNDNEEFDKISKIITILLQEKVFEGQLQDW<br>YSASLNSIDTNTDEGKKLRLAFLFSEAMFTLMTLKYINIS<br>PKEQKEIFEDLKTFL*<br>LSTKNKIDKNYLINIIEILLNDGISGLSIRRVATKANISIGG<br>VQYIFGNKKGMIKAVLEKNEEDYNRQIKILLKDDNSKYS                                                                                          | No  |
| AB 43/11       | 2 | QLKAHIEYISKHNDNEEFDKISKIITILLQEKVFLEGLQDW<br>YSASLNSIDTNTDEGKKLRLAFLFSEAMFTLMTLKYINIS<br>PKEQKEIFEDLKTFL*<br>LSTKNKIDKNYLINIIEILLNDGISGLSIRRVATKANISIGG<br>VQYIFGNKKGMIKAVLEKNEEDYNRQIKILLKDDNSKYS                                                                                          | No  |
| <b>Ab_4511</b> | 2 | QLKAHIEYISKHNDNEEFDKISKIITILLQEKVFLEGLQDW<br>YNASLNSIDTNTDEGKKLRLAFLFSEAMFTLMTLKYINIS<br>PKEQKEIFEDLKTFL*<br>LSTKNKIDKNYLINIIEILLNDGISGLSIRKVATKANISIGG<br>VQYIFGNKEGMIKAVLEKNEEDYNRQIKILLKDDNSKYS                                                                                          | No  |
| AB 47/11       | 2 | QLKAHIEYISKHNDNEEFDKISKIITILLQEKVFEGQLQDW<br>YSTSLNSIDTNTDEGKKLRLAFLFSEAMFTLMTLKYINIS<br>PKEQKEIFEDLKTFL*<br>---                                                                                                                                                                            | No  |
| CR9-1          | 2 | ---                                                                                                                                                                                                                                                                                         | --- |

|         |     |                                                                                                                                                                                                           |     |
|---------|-----|-----------------------------------------------------------------------------------------------------------------------------------------------------------------------------------------------------------|-----|
| CR18-1  | 2   | LSTKNKIDKNYLINIIEEILLNDGISGLSIRKVATKANISIGG<br>VQYIFGNKEGMIKAVLEKNEEDYNRQIKILLKDDNSKYS<br>QLKAHIEYISKHNDNEEFDKISKIITILLQEKVFEGLDW<br>YSASLNSIDTNTDEGKKLRLAFLFSEAMFTLMTLKYINIS<br>PKEQKEIFEDLKTFL*<br>---  | No  |
| CR20-1  | 0.5 | ---                                                                                                                                                                                                       | --- |
| CR21-1  | 2   | LSTKNKIDKNYLINIIEEILLNDGISGLSIRKVATKANISIGG<br>VQYIFGNKEGMIKAVLEKNEEDYNRQIKILLKDDNSKYS<br>QLKAHIEYISKHNDNEEFDKISKIITILLQEKVFEGLDW<br>YSASLNSIDTNTDEGKKLRLAFLFSEAMFTLMTLKYINIS<br>PKEQKEIFEDLKTFL*<br>---  | No  |
| CR22-2  | 4   | ---                                                                                                                                                                                                       | --- |
| CR1-1   | 2   | ---                                                                                                                                                                                                       | --- |
| CR36-1  | 2   | LSTKNKIDKNYLINIIEEILLNDGISGLSIRKVATKANISIGG<br>VQYIFGNKEGMIKAVLEKNEEDYNRQIKILLKDDNSKYS<br>QLKAHIEYISKHNDNEEFDKISKIITILLQEKVFEGLDW<br>YSASLNSIDTNTDEGKKLRLAFLFSEAMFTLMTLKYINIS<br>PKEQKEIFEDLKTFL*<br>---  | No  |
| CR40-1  | 1   | LSTKNKIDKNYLINIIEEILLNDGISGLSIRKVATKANISIGG<br>VQYIFGNKEGMIKAVLEKNEEDYNRQIKILLKDDNSKYS<br>QLKAHIEYISKHNDNEEFDKISKIITILLQEKVFEGLDW<br>YSTSLNSIDTNTDEGKKLRLAFLFSEAMFTLMTLKYINISP<br>KEQKEIFEDLKTFL*<br>---  | No  |
| CR42-3  | 2   | ---                                                                                                                                                                                                       | --- |
| CR48-2  | 2   | ---                                                                                                                                                                                                       | --- |
| CR50-1  | 1   | ---                                                                                                                                                                                                       | --- |
| CR78-1  | 1   | LSTKNKIDKNYLINIIEEILLNDGISGLSIRKVATKANISIGG<br>VQYIFGNKEGMIKAVLEKNEEDYNRQIKILLKDDNSKYS<br>QLKAHIEYISKHNDNEEFDKISKIITILLQEKVFEGLDW<br>YSTSLNSIDTNTDEGKKLRLAFLFSEAMFTLMTLKYINISP<br>KEQKEIFEDLKTFL*<br>---  | No  |
| CR90-2  | 2   | ---                                                                                                                                                                                                       | --- |
| CR101-1 | 1   | ---                                                                                                                                                                                                       | --- |
| CR1-4-1 | 4   | ---                                                                                                                                                                                                       | --- |
| CR1132  | 2   | MSTKNKIDKNYLINIIEEILLNDGISGLSIRKVATKANISIG<br>GVQYIFGNKEGMIKAVLEKNEEDYNRQIKILLKDDNSKY<br>SQLKAHIEYISKHNDNEEFDKISKIITILLQEKVFEGLD<br>WYSTSLNSIDTNTDEGKKLRLAFLFSEAMFTLMTLKYINI<br>SPKEQKEIFEDLKTFL*<br>---  | No  |
| CR1143  | 4   | MSTKNKIDKNYLINIIEEILLNDGISGLSIRRVATKANISIG<br>GVQYIFGNKKGMIKAVLEKNEEDYNRQIKILLKDDNSKY<br>SQLKAHIEYISKHNDNEEFDKISKIITILLQEKVFLEGLD<br>WYSASLNSIDTNTDEGKKLRLAFLFSEAMFTLMTLKYINI<br>SPKEQKEIFEDLKTFL*<br>--- | No  |
| Ab_1711 | 2   | MSTKNKIDKNYLINIIEEILLNDGISGLSIRKVATKANISIG<br>GVQYIFGNKEGMIKAVLEKNEEDYNRQIKILLKDDNSKY<br>SQLKAHIEYISKHNDNEEFDKISKIITILLQEKVFEGLD<br>WYSASLNSIDTNTDEGKKLRLAFLFSEAMFTLMTLKYINI<br>SPKEQKEIFEDLKTFL*<br>---  | No  |
| Ab_4211 | 2   | MSTKNKIDKNYLINIIEEILLNDGISGLSIRKVATKANISIG<br>GVQYIFGNKEGMIKAVLEKNEEDYNRQIKILLKDDNSKY<br>SQLKAHIEYISKHNDNEEFDKISKIITILLQEKVFEGLD<br>WYSASLNSIDTNTDEGKKLRLAFLFSEAMFTLMTLKYINI<br>SPKEQKEIFEDLKTFL*<br>---  | No  |
| CR891   | 2   | MSTKNKIDKNYLINIIEEILLNDGISGLSIRKVATKANISIG<br>GVQYIFGNKEGMIKAVLEKNEEDYNRQIKILLKDDNSKY<br>SQLKAHIEYISKHNDNEEFDKISKIITILLQEKVFEGLD<br>WYSTSLNSIDTNTDEGKKLRLAFLFSEAMFTLMTLKYINI<br>SPKEQKEIFEDLKTFL*<br>---  | No  |

|                  |       |                                                                                                                                                                                                                                                                                                                                                                                                      |     |
|------------------|-------|------------------------------------------------------------------------------------------------------------------------------------------------------------------------------------------------------------------------------------------------------------------------------------------------------------------------------------------------------------------------------------------------------|-----|
| <b>CR604</b>     | 0.125 | MSTKNKIDKNYLINIIEEILLNDGISGLSIRKVATKANISIG<br>GVQYIFGNKEGMIAVLEKNEEDYNRQIKILLKDDNSKY<br>SQLKAHIEYISKHNDNEEFDKISKIITILLQEKVFEGQLD<br>WYSTSLNSIDTNTDEGKKLRLAFLFSEAMFTLMTLYINI<br>SPKEQKEIFEDLKTFL*<br>MSTKNKIDKNYLINIIEEILLNDGISGLSIRKVATKANISIG<br>GVQYIFGNKEGMIAVLEKNEEDYNRQIKILLKDDNSKY<br>SQLKAHIEYISKHNDNEEFDKISKIITILLQEKVFEGQLD<br>WYSASLNSIDTNTDEGKKLRLAFLFSEAMFTLMTLYINI<br>SPKEQKEIFEDLKTFL* | No  |
| <b>1426_2003</b> | 1     | MSTKNKIDKNYLINIIEEILLNDGISGLSIRKVATKANISIG<br>GVQYIFGNKEGMIAVLEKNEEDYNRQIKILLKDDNSKY<br>SQLKAHIEYISKHNDNEEFDKISKIITILLQEKVFEGQLD<br>WYSASLNSIDTNTDEGKKLRLAFLFSEAMFTLMTLYINI<br>SPKEQKEIFEDLKTFL*<br>MSTKNKIDKNYLINIIEEILLNDGISGLSIRKVATKANISIG<br>GVQYIFGNKEGMIAVLEKNEEDYNRQIKILLKDDNSKY<br>SQLKAHIEYISKHNDNEEFDKISKIITILLQEKVFEGQLD<br>WYSASLNSIDTNTDEGKKLRLAFLFSEAMFTLMTLYINI<br>SPEEQKEIFEDLKTFL* | No  |
| <b>CR892</b>     | 2     | MSTKNKIDKNYLINIIEEILLNDGISGLSIRKVATKANISIG<br>GVQYIFGNKEGMIAVLEKNEEDYNRQIKILLKDDNSKY<br>SQLKAHIEYISKHNDNEEFDKISKIITILLQEKVFEGQLD<br>WYSASLNSIDTNTDEGKKLRLAFLFSEAMFTLMTLYINI<br>SPEEQKEIFEDLKTFL*                                                                                                                                                                                                     | No  |
| <b>A103</b>      | 2     | ---                                                                                                                                                                                                                                                                                                                                                                                                  | --- |
| <b>DQ31A1</b>    | 4     | MSTKNKIDKNYLINIIEEILLNDGISGLSIRKVATKANISIG<br>GVQYIFGNKEGMIAVLEKNEEDYNRQIKILLKDDNSKY<br>SQLKAHIEYISKHNDNEEFDKISKIITILLQEKVFEGQLD<br>WYSTSLNSIDTNTDEGKKLRLAFLFSEAMFTLMTLYINI<br>SPKEQKEIFEDLKTFL*                                                                                                                                                                                                     | No  |
| <b>Ab_3711</b>   | 1     | ---                                                                                                                                                                                                                                                                                                                                                                                                  | --- |
| <b>CR461</b>     | 1     | ---                                                                                                                                                                                                                                                                                                                                                                                                  | --- |
| <b>A111</b>      | 2     | ---                                                                                                                                                                                                                                                                                                                                                                                                  | --- |
| <b>DQ20dA1</b>   | 2     | MSTKNKIDKNYLINIIEEILLNDGISGLSIRKVATKANISIG<br>GVQYIFGNKEGMIAVLEKNEEDYNRQIKILLKDDNSKY<br>SQLKAHIEYISKHNDNEEFDKISKIITILLQEKVFEGQLD<br>WYSASLNSIDTNTDEGKKLRLAFLFSEAMFTLMTLYINI<br>SPKEQKEIFEDLKTFL*                                                                                                                                                                                                     | No  |

Isolates identified in bold correspond to predicted proteins deduced from previous whole genome sequencing (1).

--- No amplification of *areR*.

**Table S2.** Oligonucleotide sequences used in the current work.

| Primer        | Target gene | Sequence (5'→3')                                  | Application                                                                 |
|---------------|-------------|---------------------------------------------------|-----------------------------------------------------------------------------|
| tetR_F1       | tetR        | gaataagaagttcYaaaatatgatgc                        | <i>tetR</i> amplification and sequencing<br><i>tetR</i> internal sequencing |
| tetR_R1       |             | tccatcaatttgMggctaac                              |                                                                             |
| tetR_seq      |             | cattgaagagattctctta                               |                                                                             |
| areB_A1       | areB        | ttgaaataagggtactactcagg                           | Isogenic <i>cmeB</i> mutant construction                                    |
| areB_A2       |             | <i>Ttattctcctagtagtca</i> ctccaacaccatctactcttgc  |                                                                             |
| areB_B1       |             | <i>Tacctggagggaataatgatcc</i> attaggaattattgggcag |                                                                             |
| areB_B2       |             | gttcgctctggcttgcaaat                              |                                                                             |
| areA_RTPCR_F1 | areA        | agttagaccgcaaattgatgg                             | Quantitative PCR                                                            |
| areA_RTPCR_R1 |             | gcttagcatcatctgcttcttg                            |                                                                             |
| areB_RTPCR_F1 | areB        | tggaaatggacaaaatgggtg                             |                                                                             |
| areB_RTPCR_R1 |             | tccaagccctggaatagaag                              |                                                                             |
| areC_RTPCR_F1 | areC        | tcgattgatgcaaaagcaag                              |                                                                             |
| areC_RTPCR_R1 |             | ttgaagttgctgcgtattttg                             |                                                                             |

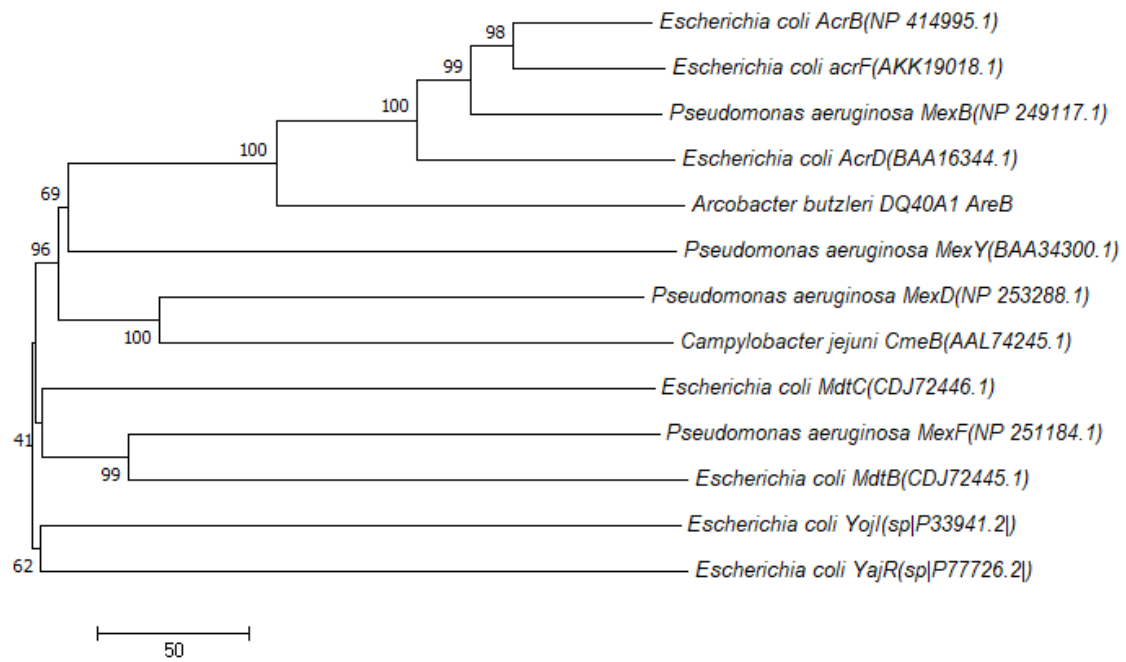

**Figure S1.** Neighbor-joining phylogenetic tree of AreB together with representatives of RND inner membrane components of *Escherichia coli*, *Pseudomonas aeruginosa* and *Campylobacter jejuni*. *Escherichia coli* MFS and ABC transporters were used in the analysis. The percentage of replicate trees in which the associated taxa clustered together in the bootstrap test (1000 replicates) are shown next to the branches. Accession numbers are shown in the parenthesis. Bar corresponds to 50 amino acid differences per sequence.

```

CR891      MSTKNKIDKNYLINIIIEILLNDGISGLSIRKVATKANISIGGVQYIFGNKEGMIKAVLE
DQ40A1    MSTKNKIDKNYLINIIIEILLNDGISGLSIRKVATKANISIGGVQYIFGNKEGMIKAVLE
CR604     MSTKNKIDKNYLINIIIEILLNDGISGLSIRKVATKANISIGGVQYIFGNKEGMIKAVLE
Ab_4511   MSTKNKIDKNYLINIIIEILLNDGISGLSIRKVATKANISIGGVQYIFGNKEGMIKAVLE
CR1132    MSTKNKIDKNYLINIIIEILLNDGISGLSIRKVATKANISIGGVQYIFGNKEGMIKAVLE
DQ31A1    MSTKNKIDKNYLINIIIEILLNDGISGLSIRKVATKANISIGGVQYIFGNKEGMIKAVLE
Ab_2211   MSTKNKIDKNYLINIIIEILLNDGISGLSIRKVATKANISIGGVQYIFGNKEGMIKAVLE
DQ20dA1   MSTKNKIDKNYLINIIIEILLNDGISGLSIRKVATKANISIGGVQYIFGNKEGMIKAVLE
CR1143    MSTKNKIDKNYLINIIIEILLNDGISGLSIRRVATKANISIGGVQYIFGNKKGMIKAVLE
Ab_1711   MSTKNKIDKNYLINIIIEILLNDGISGLSIRKVATKANISIGGVQYIFGNKEGMIKAVLE
Ab_4211   MSTKNKIDKNYLINIIIEILLNDGISGLSIRKVATKANISIGGVQYIFGNKEGMIKAVLE
1426_2003 MSTKNKIDKNYLINIIIEILLNDGISGLSIRKVATKANISIGGVQYIFGNKEGMIKAVLE
CR892     MSTKNKIDKNYLINIIIEILLNDGISGLSIRKVATKANISIGGVQYIFGNKEGMIKAVLE
CR641     MSTKNKIDKNYLINIIIEILLNDGISGLSIRKVATKANISIGGVQYIFGNKEGMIKAVLE
Ab_2811   MSTKNKIDKNYLINIIIEILLNDGISGLSIRKVATKANISIGGVQYIFGNKEGMIKAVLE
CR502     MSTKNKIDKNYLINIIIEILLNDGISGLSIRKVATKANISIGGVQYIFGNKEGMIKAVLE
CR424     MSTKNKIDKNYLINIIIEILLNDGISGLSIRKVATKANISIGGVQYIFGNKEGMIKAVLE
*****:*****:*****

CR891      KNEEDYNRQIKILLKDDNSKYSQLKAHIEYISKHNDNEEFDKISKIITILLQEKVFVEGL
DQ40A1    KNEEDYNRQIKILLKDDNSKYSQLKAHIEYISKHNDNEEFDKISKIITILLQEKVFVEGL
CR604     KNEEDYNRQIKILLKDDNSKYSQLKAHIEYISKHNDNEEFDKISKIITILLQEKVFVEGL
Ab_4511   KNEEDYNRQIKILLKDDNSKYSQLKAHIEYISKHNDNEEFDKISKIITILLQEKVFVEGL
CR1132    KNEEDYNRQIKILLKDDNSKYSQLKAHIEYISKHNDNEEFDKISKIITILLQEKVFVEGL
DQ31A1    KNEEDYNRQIKILLKDDNSKYSQLKAHIEYISKHNDNEEFDKISKIITILLQEKVFVEGL
Ab_2211   KNEEDYNRQIKILLKDDNSKYSQLKAHIEYISKHNDNEEFDKISKIITILLQEKVFVEGL
DQ20dA1   KNEEDYNRQIKILLKDDNSKYSQLKAHIEYISKHNDNEEFDKISKIITILLQEKVFVEGL
CR1143    KNEEDYNRQIKILLKDDNSKYSQLKAHIEYISKHNDNEEFDKISKIITILLQEKVFVEGL
Ab_1711   KNEEDYNRQIKILLKDDNSKYSQLKAHIEYISKHNDNEEFDKISKIITILLQEKVFVEGL
Ab_4211   KNEEDYNRQIKILLKDDNSKYSQLKAHIEYISKHNDNEEFDKISKIITILLQEKVFVEGL
1426_2003 KNEEDYNRQIKILLKDDNSKYSQLKAHIEYISKHNDNEEFDKISKIITILLQEKVFVEGL
CR892     KNEEDYNRQIKILLKDDNSKYSQLKAHIEYISKHNDNEEFDKISKIITILLQEKVFVEGL
CR641     KNEEDYNRQIKILLKDDNSKYSQLKAHIEYISKHNDNEEFDKISKIITILLQEKVFVEGL
Ab_2811   KNEEDYNRQIKILLKDDNSKYSQLKAHIEYISKHNDNEEFDKISKIITILLQEKVFVEGL
CR502     KNEEDYNRQIKILLKDDNSKYSQLKAHIEYISKHNDNEEFDKISKIITILLQEKVFD---
CR424     KNEEDYNRQIKILLKDDNSKYSQLKAHIEYISKHNDNEEFDKISKIITILLQEKVFD---
*****:*****:*****

CR891      QDWYSTSLNSIDTNTDEGKKLRLAFLFSEAMFTLMTLKYINISPKEQKEIFEDLKTFFLL
DQ40A1    QDWYSTSLNSIDTNTDEGKKLRLAFLFSEAMFTLMTLKYINISPKEQKEIFEDLKTFFLL
CR604     QDWYSTSLNSIDTNTDEGKKLRLAFLFSEAMFTLMTLKYINISPKEQKEIFEDLKTFFLL
Ab_4511   QDWYSTSLNSIDTNTDEGKKLRLAFLFSEAMFTLMTLKYINISPKEQKEIFEDLKTFFLL
CR1132    QDWYSTSLNSIDTNTDEGKKLRLAFLFSEAMFTLMTLKYINISPKEQKEIFEDLKTFFLL
DQ31A1    QDWYSTSLNSIDTNTDEGKKLRLAFLFSEAMFTLMTLKYINISPKEQKEIFEDLKTFFLL
Ab_2211   QDWYSTSLNSIDTNTDEGKKLRLAFLFSEAMFTLMTLKYINISPKEQKEIFEDLKTFFLL
DQ20dA1   QDWYSASLNSIDTNTDEGKKLRLAFLFSEAMFTLMTLKYINISPKEQKEIFEDLKTFFLL
CR1143    QDWYSASLNSIDTNTDEGKKLRLAFLFSEAMFTLMTLKYINISPKEQKEIFEDLKTFFLL
Ab_1711   QDWYSASLNSIDTNTDEGKKLRLAFLFSEAMFTLMTLKYINISPKEQKEIFEDLKTFFLL
Ab_4211   QDWYSASLNSIDTNTDEGKKLRLAFLFSEAMFTLMTLKYINISPKEQKEIFEDLKTFFLL
1426_2003 QDWYSASLNSIDTNTDEGKKLRLAFLFSEAMFTLMTLKYINISPKEQKEIFEDLKTFFLL
CR892     QDWYSASLNSIDTNTDEGKKLRLAFLFSEAMFTLMTLKYINISPKEQKEIFEDLKTFFLL
CR641     QDWYSASLNSIDTNTDEGKN-----
Ab_2811   QDWYSAS-----
CR502     -----
CR424     -----VGTQRIWPPRAFTLGQLTHNDLAS-----

```

**Figure S2.** Alignment of AreR from 17 *Aliarcobacter butzleri* strains.

Asterisks indicate amino acids that were common to all sequences, colons and dots indicate structurally similar amino acids as calculated by the Clustal W program.



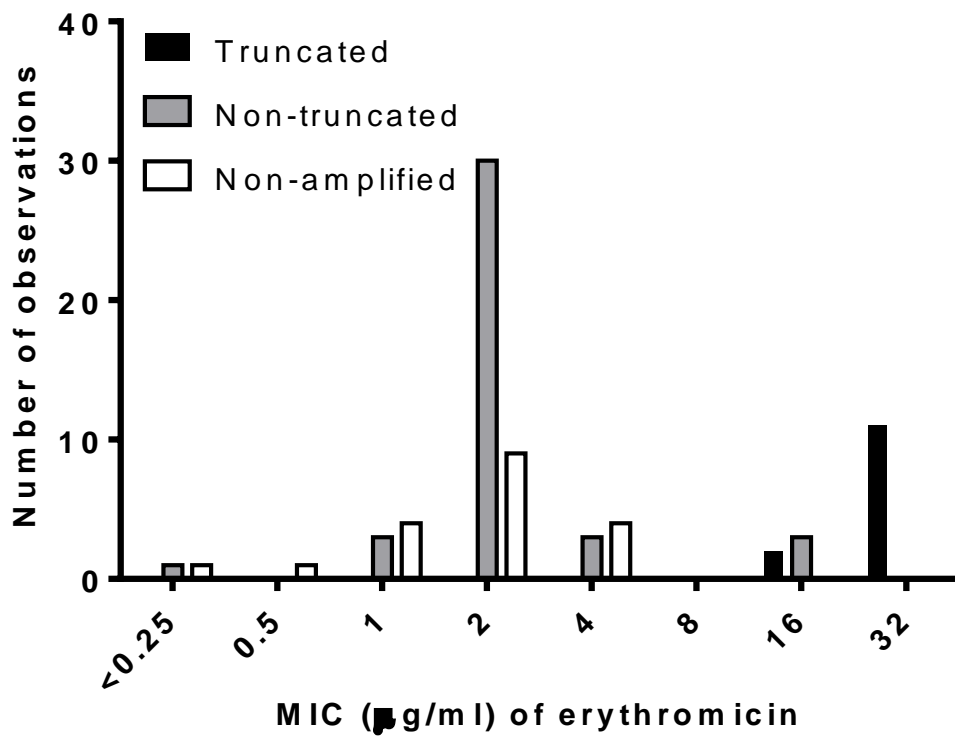

**Figure S3.** Distribution of minimum inhibitory concentration of erythromycin for *Aliarcobacter butzleri* isolates. Truncated indicates strains with a truncated predicted AreR, Non-truncated indicates strains with a non-truncated predicted AreR, Non-amplified depicts isolates for which no amplification was obtained.

## Reference

1. Isidro J, Ferreira S, Pinto M, Domingues F, Oleastro M, Gomes JP, Borges V. 2020. Virulence and antibiotic resistance plasticity of *Arcobacter butzleri*: Insights on the genomic diversity of an emerging human pathogen. *Infect Genet Evol* 80:pii=104213. <https://doi.org/10.1016/j.meegid.2020.104213>
